1  
2  
3  
4  
5  
6  
7  
8  
9  
10  
11  
12  
13  
14  
15  
16  
17  
18  
19  
20  
21  
22  
23  
24  
25  
26  
27

**Prevalence and Associated Risk Factors of Scabies and Impetigo: A Cross-Sectional Study in the Nata Catchment Areas of Tutume District, Botswana**

Leungo Audrey Nthibo\*<sup>1</sup>, Tuduetso Leka Molefi<sup>2</sup>, Sidney Otladisa Kololo<sup>2</sup>, Tshepo Botho Leeme<sup>1</sup>, Mpho Selemogo<sup>2</sup>, Mooketsi Molefi<sup>1</sup>

<sup>1</sup> Department of Family Medicine & Public Health, Faculty of Medicine, University of Botswana, Gaborone, Botswana

<sup>2</sup> Disease Control Division, Community Health Services, Ministry of Health, Gaborone, Botswana

\*Corresponding author

Email : leungonthibo@gmail.com

## 28 **Abstract**

29 **Background:** Scabies is a poorly understood disease in the developing world, particularly in regions  
30 with high disease burden. Lack of epidemiological data, especially in sub-Saharan Africa, hampers our  
31 understanding of the disease's occurrence and impact. This study aimed to estimate the prevalence and  
32 associated risk factors of scabies and impetigo in the Nata catchment areas of Tutume district.

33 **Methodology:** A cross-sectional study was conducted in the Nata catchment area, targeting the  
34 settlements of Manxhotae, Malelejwe, Ndutshaa, and Tshwaane. Participants were randomly selected  
35 from randomly selected households. Data were collected using questionnaires, and scabies was  
36 confirmed by skin examination using the International Alliance for the Control of Scabies (IACS)  
37 consensus criteria. Statistical significance was set at  $p < 0.05$ , with a 95% confidence interval for  
38 precision.

39 **Results:** A total of 429 participants were enrolled across the four settlements. The highest prevalence  
40 of scabies was in Manxhotae at 27.1% (21.2-34.0) and Ndutshaa at 23.4% (13.4-37.3). Malelejwe and  
41 Tshwaane had lower prevalence of 10.4% (6.2-16.8) and 3.4% (0.8-12.7), respectively. Only five(5)  
42 cases of impetigo were identified. Multivariable logistic regression analysis using the IACS criteria  
43 revealed that younger age and a household member with an itch were strongly associated with scabies,  
44 with adjusted odds ratios (AOR) of 5.69 [3.16-10.26] and 5.31 [2.76-10.21], respectively, however, a  
45 less sensitive criterion also included less frequent bathing as a significant exposure , AOR of 3.3 [1.9-  
46 5.8]

47 **Conclusion:** The prevalence of scabies in the Nata catchment area was unexpectedly high. The risk  
48 factors included younger age, a household member with an itch, and less frequent bathing. Prospective  
49 studies are needed to explore household disease transmission dynamics and risk factors specific to the  
50 youth.

51 **Keywords:** Scabies, impetigo, associated risk factors, Botswana

52 **Word count:**267

## 53 **Author Summary**

54 This study was carried out in the Nata catchment area in Tutume district, Botswana. It aimed to assess  
55 the burden, risk factors informing effective disease control programs. The survey involved interviews  
56 and skin examination by a health worker. Findings revealed a higher incidence of scabies cases, while  
57 impetigo cases were less prevalent. These results highlight the need for community-wide interventions  
58 to mitigate the disease's impact. Identified risk factors include younger age, residing with an individual  
59 experiencing itchiness, and infrequent bathing. Overall, this study supports advocating for scabies as a  
60 neglected tropical disease.

## 61 **Introduction**

62 Scabies was added to the list of Neglected Tropical Diseases (NTDs) in 2017 due to its high burden and  
63 complications, particularly in areas with limited healthcare access(1). It is caused by a parasitic mite  
64 and often leads to impetigo, a bacterial skin infection. Lack of epidemiological data, especially in sub-  
65 Saharan Africa, hampers our understanding of the disease's occurrence and impact. Scabies primarily  
66 spreads through direct skin-to-skin contact, and common risk factors include children, the elderly,  
67 immunocompromised individuals, overcrowding, and poverty(1-4). Scabies control efforts by the  
68 World Health Organization involve mapping disease burden, delivering interventions, and establishing  
69 monitoring and evaluation frameworks(1, 5). However, the lack of a field-friendly diagnostic test makes  
70 assessing scabies prevalence challenging.

71

72 In Botswana, as in many sub-Saharan African settings, the prevalence of scabies is poorly understood,  
73 with sporadic cases reported. Local epidemiological studies are needed to improve our understanding  
74 of the disease burden and associated risk factors, enabling the development of effective control  
75 programs. Previous experiences with other NTDs highlight the importance of mapping to successfully  
76 scale up control efforts(1, 2). This study aims to estimate the prevalence of scabies and impetigo, as  
77 well as identify associated risk factors in the Nata catchment area of Tutume district, Botswana. Such  
78 information will contribute to the implementation of appropriate and efficient disease control strategies.

79

## 80 **Methods**

81 **Study design:** This was a cross-sectional study whose main aim was to estimate the burden of scabies  
82 in the Nata catchment area following a confirmed outbreak. Analytic methods were used to determine  
83 possible risk factors associated with scabies.

84 **Study setting and participants:** the study was conducted in the Nata catchment area, in Tutume  
85 district North-east of Botswana. Nata catchment area is predominantly a rural area. The population  
86 consists mainly of subsistence farmers and livestock herders. Health care services are provided through  
87 a Clinic in Nata, Health post in Manxhotae and mobile stops in the other settlements. Inclusion criteria  
88 included participants living in the selected communities, attending the selected schools and willing to  
89 participate in the survey. Individuals who did not live in the selected communities, who were unwilling  
90 to participate in the study and who were absent at the time of the visit were excluded from the study.

91 **Sampling:** The study was performed during a mass drug administration campaign in the district  
92 following a confirmed scabies outbreak. Systematic sampling of households was done wherein study  
93 participants were randomly selected. In each household we enrolled every second person available.

94 Sample size calculation :the number of participants to be enrolled per site was determined using  
95 Cochran's formula for sample size. Assuming a prevalence of 10% for the community, 7.5% margin of  
96 error and a design effect of 2.0 to cater for any clustering that may occur. For each of the sites, the  
97 following sample sizes were derived: Settlement Population Sample size Manxhotae 98 Malelejwe 94  
98 Tshwaane 92 Nduutsha 88

99 **Data collection:** prior to data collection community mobilization and sensitization was conducted  
100 by district healthcare workers in the communities that were to be surveyed. 1. Trained health care  
101 workers carried out a standardized skin examination in a private space set aside in the home/house. A  
102 skin examination of exposed regions of the body was performed on all participants. Scabies was  
103 diagnosed based on the criteria of the International Alliance for the Control of Scabies (IACS).  
104 (Appendix 1) Demographic information of the participants as well as clinical information was captured

105 using a REDCap based questionnaire that was adapted from “A scabies outbreak in the North East  
106 Region of Ghana: The necessity for prompt intervention “ by Amoako and others.(6)

107 **Ethical considerations:** written permission was obtained from the district health authorities. All  
108 participants were required to provide written informed consent. For children within the communities,  
109 written consent was obtained from parents or legal guardians and verbal assent was obtained from the  
110 children who wished to participate in the survey. All participants diagnosed with scabies or scabies and  
111 impetigo were treated with topical permethrin cream alone or in combination with cloxacillin.

112 **Statistical analysis:** Data captured on REDcap software was transferred to Stata 13 (7) for further  
113 management and analysis. Demographic (e.g. sex), and clinical data (e.g. presence of an itch, rash etc)  
114 were summarized using frequencies and percentages for categorical variables, while for continuous  
115 variables e.g. age, normality tests were run and data summarised appropriately. Prevalence was  
116 calculated as the proportion of participants that report an itch or rash consistent with scabies or impetigo  
117 out of the total sample. Overall and per site prevalence was estimated. A binary regression logistic  
118 regression model was used to determine risk factors associated with the development of scabies.  
119 Whether as per international alliance for the Control of Scabies (IACS) consensus criteria has scabies  
120 or not was the dependent variable coded (1/0) in Stata, respectively. Several independent factors were  
121 evaluated as possible risk factors, these included sharing of bed or under-garments, bathing routine,  
122 presence of pipe-borne water in the homesteads. Confounding and effect modification were investigated  
123 and adjusted for. All measurements are reported with 95% precision and p-value of <0.05 is considered  
124 statistically significant.

## 125 **Results**

126 A total of 429 participants were surveyed in all the selected villages, 188 (43.82%) in Manxotae, 135  
127 (31.47%) in Malelejwe, 59 (13.75%) in Tshwaane , and 47 (10.96%) in Ndutshaa. The characteristics  
128 of the participants are displayed in [table 1](#). 58% of the participants were female, while 41.75% were  
129 male. The median age is 35 years with an interquartile range of 25 and 56 years.

130

131

132 Table 1: Characteristics of study participants and proportion per village

| Characteristics | n (percentage) |
|-----------------|----------------|
| Gender          | (n=412)        |
| Male            | 172(41.75)     |
| Female          | 240(58.25)     |
| Age             | (n=380)        |
| 0-9             | 39(10.26)      |
| 10-19           | 60(15.79)      |
| 20-29           | 73(19.21)      |
| 30-39           | 76(20.00)      |
| 40-49           | 36(9.47)       |
| 50-59           | 28(7.37)       |
| 60-65           | 19(5.00)       |
| >65             | 49(12.89)      |
| Village         | (n=429)        |
| • Manxhotae     | 188(43.82)     |
| • Malelejwe     | 135(31.47)     |
| • Tshwaane      | 59(13.75)      |
| Ndutshaa        | 47(10.96)      |

133

134 Table 2 shows prevalence of scabies by examination findings stratified per village. The village with the  
 135 highest prevalence of scabies was Manxhotae, with a prevalence of 27.13%(21.22-33.96), followed by  
 136 Nduutsha with a prevalence of 23.40% (13.35-37.73). Malelejwe and Tshwaane had a prevalence of  
 137 10.37% (6.22-16.80) and 3.39(0.84-12.74%) respectively.

138

139 Table 2: Prevalence of scabies by village using exam findings.

| Village  | # with scabies (exam) | Population accessed | Prevalence (95%CI) |
|----------|-----------------------|---------------------|--------------------|
| Manxotae | 51                    | 188                 | 27.13(21.22-33.96) |

|           |    |     |                     |
|-----------|----|-----|---------------------|
| Malelejwe | 14 | 135 | 10.37(6.22-16.80)   |
| Tshwaane  | 2  | 59  | 3.39(0.84-12.74)    |
| Ndutshaa  | 11 | 47  | 23.40 (13.35-37.73) |
| Overall   | 78 | 429 | 18.18(14.80-22.14)  |

140

141 Using self-reported itch as proxy for scabies (see [table 3](#)), we note that in the unadjusted logistic  
 142 regression model, age group less than 18 years of age (school going-age), those who reported someone  
 143 an itch in the household, shared bedding and under-garments, and bathed other than once daily had  
 144 higher odds of reporting an itch than their counterparts, OR=3.97[1.91-5.13],OR=5.20[3.26-  
 145 8.29],OR=1.63[1.05-2.51], OR=1.52[0.91-2.52] and OR=2.31[1.42-3.74], respectively.

146

147 Table 3: Predictors of scabies using itch as proxy-unadjusted and adjusted binary logistic regression  
 148 model

| Variables                   | Unadjusted analysis |      |         |           | Adjusted multivariable regression(n=363) |
|-----------------------------|---------------------|------|---------|-----------|------------------------------------------|
|                             | UO                  | SE±  | p-value | 95% CI    | AO 95% CI                                |
| <b>Demographics</b>         |                     |      |         |           |                                          |
| Age (years) (n=378)         |                     |      |         |           |                                          |
| 0-18                        | 3.79                | 0.78 | 0.000*  | 1.91-5.13 | 3.28 ( 1.87-5.76)*                       |
| >18                         | 1                   | -    | -       | -         |                                          |
| Sex(n=410)                  |                     |      |         |           |                                          |
| Female                      | 1.12                | 0.24 | 0.617   | 0.73-1.71 | -                                        |
| Male                        | 1                   | -    | -       | -         |                                          |
| Number in household (n=411) | 0.99                | 0.03 | 0.944   | 0.94-1.06 |                                          |

|                                                         |      |      |        |           |                    |
|---------------------------------------------------------|------|------|--------|-----------|--------------------|
|                                                         |      |      |        |           |                    |
| Exposures                                               |      |      |        |           |                    |
| Any who complained of the itch in the household (n=425) |      |      |        |           |                    |
| Yes                                                     | 5.20 | 1.23 | 0.000* | 3.26-8.29 | 6.94 (3.92-12.29)* |
| No                                                      | 1    | -    | -      | -         | -                  |
| Shared bedding (mattress, sheets etc) (n=425)           |      |      |        |           |                    |
| Yes                                                     | 1.63 | 0.36 | 0.030* | 1.05-2.51 | -                  |
| No                                                      | 1    | -    | -      | -         | -                  |
| Shared room(n=398)                                      |      |      |        |           |                    |
| Yes                                                     | 1.08 | 0.08 | 0.328  | 0.93-1.26 | -                  |
| No                                                      |      |      |        |           |                    |
| Shared under-garments(n=421)                            |      |      |        |           |                    |
| Yes                                                     | 1.52 | 0.40 | 0.111* | 0.91-2.52 | 1.17 0.62-2.22     |
| No                                                      | 1    |      |        |           |                    |
| Bath routine (n=416)                                    |      |      |        |           |                    |
| Other than daily                                        | 2.31 | 0.57 | 0.001* | 1.42-3.74 | 2.06 1.42-4.80*    |
| Daily                                                   | 1    | -    | -      | -         |                    |

149 \*-statistically significant 95% CI or p-value<0.05 unless otherwise stated

150

151



152 However, in the multivariable binary logistic regression model (see [table 4](#)) only younger age, those  
 153 who reported to have had a household contact with an itch, and those who bathed other than daily  
 154 had statistically significant odds of having scabies, OR=3.28 [ 1.87-5.76], OR=6.94[3.92-12.29] and  
 155 OR=2.31[1.42-4.80]

156

157 Table 4: Predictors of scabies by examination of skin lesions-unadjusted and adjusted multivariable  
 158 regression model

| Variables                                               | Unadjusted analysis |      |         |            | Adjusted multivariable regression(n=363) |
|---------------------------------------------------------|---------------------|------|---------|------------|------------------------------------------|
|                                                         | UO                  | SE±  | p-value | 95% CI     | AO 95% CI                                |
| Demographics                                            |                     |      |         |            |                                          |
| Age (years) (n=378)                                     |                     |      |         |            |                                          |
| 0-18                                                    | 6.56                | 1.86 | 0.000*  | 3.82-11.26 | 5.69 3.16-10.26*                         |
| >18                                                     | 1                   | -    | -       | -          |                                          |
| Sex(n=410)                                              |                     |      |         |            |                                          |
| Female                                                  | 1.30                | 0.34 | 0.319   | 0.77-2.19  | -                                        |
| Male                                                    | 1                   | -    | -       | -          |                                          |
| Number in household (n=411)                             | 1.68                | 0.43 | 0.040*  | 1.01-2.78  | 0.98 0.55-1.75                           |
| Exposures                                               |                     |      |         |            |                                          |
| Any who complained of the itch in the household (n=425) |                     |      |         |            |                                          |
| Yes                                                     | 5.91                | 1.76 | 0.000*  | 3.29-10.59 | 5.31 2.76-10.21*                         |
| No                                                      | 1                   | -    | -       | -          |                                          |

|                                                     |      |       |        |           |                |
|-----------------------------------------------------|------|-------|--------|-----------|----------------|
| Shared bedding<br>(mattress, sheets etc)<br>(n=426) |      |       |        |           |                |
| Yes                                                 | 2.25 | 0.363 | 0.004* | 1.30-3.90 | 1.10 0.59-2.06 |
| No                                                  | 1    | -     | -      | -         | 1              |
| Shared room(n=399)                                  |      |       |        |           |                |
| Yes                                                 | 0.99 | 0.64  | 0.991  | 0.28-3.55 | -              |
| No                                                  | 1    | -     | -      | -         |                |
| Shared under-garments(n=422)                        |      |       |        |           |                |
| Yes                                                 | 2.38 | 0.68  | 0.002* | 1.37-4.15 | 1.58 0.81-3.07 |
| No                                                  | 1    | -     |        |           | 1              |
| Bath routine (n=417)                                |      |       |        |           |                |
| Other than daily                                    | 1.41 | 0.41  | 0.236  | 0.80-2.51 | - -            |
| Daily                                               | 1    | -     | -      | -         |                |

159 \*-statistically significant 95% CI or p-value<0.05 unless otherwise stated

160

161 In the diagnosis of scabies by examination of skin lesions, running an unadjusted regression model we  
 162 noted that younger age (<18 years of age), increasing number of household members, those that reported  
 163 someone else with an itch in the household, those who shared bedding and under-garments reported  
 164 higher odds of scabies than their comparators, OR=6.56[3.82-11.26], OR=1.68[1.01-2.78],  
 165 OR=5.91[3.29-10.59],OR=2.25[1.30-3.90] and OR=2.38[1.37-4.15], respectively however, in the  
 166 multivariable binary logistic regression model only younger age and those who reported someone with  
 167 an itch in the household emerged statistically significant, OR=5.69[3.16-10.26] and OR=5.31[2.76-  
 168 10.21], respectively.

169

## 170 **Discussion**

171 The burden of scabies was found to be highest in Manxhotae with a prevalence of 27.3% while overall  
172 prevalence for the Nata catchment area was found to be 18.8%. A systematic review which also included  
173 grey literature in all regions except North America found that the prevalence of scabies ranged from  
174 0.2% to 71.4%, most regions had a prevalence more than 10%, this was in keeping with majority of  
175 population based studies in prevalence of scabies(2, 8-11). The high prevalence of scabies in the Nata  
176 catchment area which is like other studies suggests the need for intensified surveillance and case  
177 management to prevent further outbreaks. The high prevalence of the disease is suggestive of the  
178 unappreciation of scabies in resource-poor communities, and difficult access to the health system. The  
179 framework for scabies advises intensive clinical management of scabies for prevalence rates more than  
180 10% and consideration for MDA(1). In most studies the prevalence of scabies in high burden countries  
181 decreased significantly after MDA (12-14). More than one cycle of MDA may be necessary to control  
182 the burden of the disease. Impetigo is found to be common, particularly in children. (3, 8, 15). Given  
183 that the study was performed during a confirmed scabies outbreak there may have been a degree of  
184 selection bias. The population on Nata catchment area also have a higher degree of poverty and  
185 overcrowding in households compared to the rest of the country. The villages selected for study are  
186 predominantly settlement type of villages. Other challenges also include shortage of water which may  
187 have played a role in the high prevalence. The International Alliance for the Control of scabies (IACS)  
188 has outlined a case definition for diagnosis of scabies however due to lack of objective diagnostic tests  
189 case under-ascertainment and underreporting may be a limiting factor in capturing the true picture of  
190 scabies cases on daily basis. Although scabies was more prevalent in the settlements, only a few cases  
191 of impetigo were identified. Five (5) cases of scabies and impetigo were identified, all from Manxhotae  
192 this was different from a population-based survey done in Fiji(10) which showed a prevalence of  
193 impetigo of 19.6% .other studies also showed a higher prevalence of co-infection of scabies and  
194 impetigo (16-18).The co-infection of scabies and impetigo is relatively common, especially in  
195 communities with poor hygiene and sanitation. This is because both conditions are highly contagious  
196 and tend to affect people living in close proximity to each other and crowded living conditions.

197 According to a study published in the Journal of Global Infectious Disease, the co-infection rate of  
198 scabies and impetigo in certain populations ranged from 10-83% and was particularly common in  
199 children (2). In some cases, the presence of scabies may increase the risk of developing impetigo  
200 because the intense itching caused by the mites can lead to skin damage and subsequent bacterial  
201 infection.

202

203 Analysing factors associated with scabies using itch as a proxy to scabies, in the multivariable logistic  
204 regression those who were <18 years, those who reported to have had someone with an itch in the  
205 household, and those who bathed other than daily had statistically significant odds of scabies. This  
206 finding is in keeping with most studies (8, 9). Nata catchment area is a settlement area with challenges  
207 such as poverty, shortage of water therefore the bathing routine is compromised resulting in most people  
208 bathing less frequently. Households have at most 5 people sharing a room which increases risk of  
209 transmission of human-to-human contact transmitted diseases. Sharing blankets and clothes is also a  
210 common practice which is culturally acceptable. This study did not show statistically significant results  
211 for association of higher household number with scabies which is different from other studies (6, 8, 17).  
212 Using examination findings to diagnose scabies in the unadjusted model younger age (<18 years of  
213 age); where the number of household members exceeds a median of 4; those that reported someone else  
214 with an itch in the household, and those who shared bedding and under-garments reported higher odds  
215 of scabies than their comparators. However, in the multivariable binary logistic regression model only  
216 younger age and those who reported someone with an itch in the household emerged statistically  
217 significant. Due to the weaker association between the other factors and scabies, the effect size  
218 diminished in the multivariable model. Although our findings are consistent with a systematic review  
219 and meta-analysis carried out in Ethiopia (11) which showed a correlation between the number of  
220 members per household and the risk of scabies, the magnitude of association found in our study was  
221 not as strong, and therefore the effect diminished in the multivariable model. (11)

222

223 This study possesses several strengths and limitations. It stands out as one of the few globally and  
224 regionally conducted studies shedding light on the neglected yet debilitating disease's epidemiology.

225 The analysis conducted in this study identifies established risk factors, such as a higher burden of the  
226 disease among the younger population, overcrowding, and its association with low socioeconomic  
227 status. However, the study did not explore other potential risk factors, such as the disease's heightened  
228 risk among the HIV population.

229

230 Furthermore, while our multivariable regression models suggest potential associations between certain  
231 exposures and the occurrence of scabies, the lack of temporality between the exposure and outcome  
232 variables prevents us from fully establishing the findings. To provide a more comprehensive  
233 understanding of the associated factors, future epidemiological studies need to incorporate temporality,  
234 ensuring a clear delineation that exposure variables under investigation preceded the outcome.

## 235 **Conclusion**

236 The study findings indicate a high overall prevalence of scabies and associated impetigo in the Nata  
237 Catchment area, with the highest prevalence observed in Manxhotae village. Our analysis of  
238 examination findings revealed that younger age and a history of someone with an itch in the household  
239 were identified as factors strongly associated with scabies.

240

## 241 **Acknowledgements**

242 We would like to thank the Ministry of Health Botswana disease control division and the University of  
243 Botswana, department of Family Medicine & Public health leadership for affording the team the  
244 opportunity to carry out the investigation. We are equally thankful to the communities and participants  
245 who contributed to this study. Our gratitude is also extended to the Tutume DHMT community health  
246 nurse and health care assistants for helping with data collection and navigating the district.

247

## 248 **Data availability**

249 Data is available on request to the corresponding author.

250

## 251 **Funding**

252 There was no direct funding allocated to this study. Only Ministry of Health Botswana and University  
253 of Botswana resources were used.

254

#### 255 **Author Contributions**

256 **Conceptualization and Methodology:** Leungo Audrey Nthibo, Tuduetsso Leka Molefi, Sidney  
257 Otladisa Kololo, Tshepo Botho Leeme, Mpho Selemogo, Mooketsi Molefi

258 **Investigation and Validation:** Leungo Audrey Nthibo, Tuduetsso Leka Molefi, Sidney Otladisa Kololo,  
259 Tshepo Botho Leeme, Mooketsi Molefi.

260 **Formal analysis:** Mooketsi Molefi

261 **Supervision:** Mooketsi Molefi

262 **Writing – original draft:** Leungo Audrey Nthibo & Mooketsi Molefi

263 **Writing – review & editing:** Tuduetsso Leka Molefi, Sidney Otladisa Kololo, Tshepo Botho Leeme,  
264 Mpho Selemogo

265 All authors read and approved the final manuscript.

266

267 **Corresponding author:** Correspondence to be addressed to Leungo Audrey Nthibo.

268

269 **Ethics declaration :** The study was approved by the Ministry of Health human research and  
270 development Unit. Ref No:HRDP:6/13/1

271

272 **Conflict of interest:** The authors declare that they have no conflict of interest.

273

274

#### 275 **References**

276 1. WHO. WHO informal consultation on a framework for scabies control: World Health  
277 Organization Regional Office for the Western Pacific: Manila, Philippines, 19–21 February 2019:  
278 meeting report. 2020.

- 279 2. Carapetis JR, Connors C, Yarmirr D, Krause V, Currie BJ. Success of a scabies control program  
280 in an Australian aboriginal community. *The Pediatric infectious disease journal*. 1997;16(5):494-9.
- 281 3. Feldmeier H, Jackson A, Ariza L, Lins Calheiros CM, de Lima Soares V, Oliveira FA, et al.  
282 The epidemiology of scabies in an impoverished community in rural Brazil: Presence and severity of  
283 disease are associated with poor living conditions and illiteracy. *Journal of the American Academy of*  
284 *Dermatology*. 2009;60(3):436-43.
- 285 4. Wochebo W, Haji Y, Asnake S. Scabies outbreak investigation and risk factors in Kechabira  
286 district, Southern Ethiopia: unmatched case control study. *BMC research notes*. 2019;12(1):1-6.
- 287 5. Engelman D, Marks M, Steer AC, Beshah A, Biswas G, Chosidow O, et al. A framework for  
288 scabies control. *PLoS neglected tropical diseases*. 2021;15(9):e0009661.
- 289 6. Amoako YA, Phillips RO, Arthur J, Abugri MA, Akowuah E, Amoako KO, et al. A scabies  
290 outbreak in the North East Region of Ghana: The necessity for prompt intervention. *PLoS neglected*  
291 *tropical diseases*. 2020;14(12):e0008902.
- 292 7. StataCorp. *Stata Statistical Software: .* College Station, TX: StataCorp LP; 2013.
- 293 8. Osti MH, Sokana O, Gorae C, Whitfeld MJ, Steer AC, Engelman D. The diagnosis of scabies  
294 by non-expert examiners: A study of diagnostic accuracy. *PLoS neglected tropical diseases*.  
295 2019;13(8):e0007635.
- 296 9. Walker SL, Collinson S, Timothy J, Zayzay SK, Kollie KK, Candy N, et al. A community-  
297 based validation of the International Alliance for the Control of Scabies Consensus Criteria by expert  
298 and non-expert examiners in Liberia. *PLoS Neglected Tropical Diseases*. 2020;14(10):e0008717.
- 299 10. Romani L, Koroivueta J, Steer AC, Kama M, Kaldor JM, Wand H, et al. Scabies and impetigo  
300 prevalence and risk factors in Fiji: a national survey. *PLoS neglected tropical diseases*.  
301 2015;9(3):e0003452.
- 302 11. Azene AG, Aragaw AM, Wassie GT. Prevalence and associated factors of scabies in Ethiopia:  
303 systematic review and Meta-analysis. *BMC Infectious Diseases*. 2020;20(1):380.
- 304 12. Kearns TM, Speare R, Cheng AC, McCarthy J, Carapetis JR, Holt DC, et al. Impact of an  
305 ivermectin mass drug administration on scabies prevalence in a remote Australian Aboriginal  
306 community. *PLoS neglected tropical diseases*. 2015;9(10):e0004151.

- 307 13. Marks M, Toloka H, Baker C, Kositz C, Asugeni J, Puiahi E, et al. Randomized trial of  
308 community treatment with azithromycin and ivermectin mass drug administration for control of scabies  
309 and impetigo. *Clinical infectious diseases*. 2019;68(6):927-33.
- 310 14. Romani L, Whitfeld MJ, Koroivueta J, Kama M, Wand H, Tikoduadua L, et al. Mass drug  
311 administration for scabies control in a population with endemic disease. *New England Journal of*  
312 *Medicine*. 2015;373(24):2305-13.
- 313 15. Nazari M, Azizi A. Epidemiological pattern of scabies and its social determinant factors in west  
314 of Iran. *Health*. 2014;2014.
- 315 16. Matthews A, Le B, Amaral S, Arkell P, Monteiro M, Clarke N, et al. Prevalence of scabies and  
316 impetigo in school-age children in Timor-Leste. *Parasites & Vectors*. 2021;14:1-9.
- 317 17. Romani L, Steer AC, Whitfeld MJ, Kaldor JM. Prevalence of scabies and impetigo worldwide:  
318 a systematic review. *The Lancet Infectious Diseases*. 2015;15(8):960-7.
- 319 18. Osti MH, Sokana O, Phelan S, Marks M, Whitfeld MJ, Gorae C, et al. Prevalence of scabies  
320 and impetigo in the Solomon Islands: a school survey. *BMC Infectious Diseases*. 2019;19(1):803.
- 321
